# Supplementary material for: Three-Way DNA Junction as an End Label for DNA in Atomic Force Microscopy Studies
Source: MDPI journal article supplement (doi:10.3390/ijms231911404), 2022-09-27
Supplement: s1 [file s1]

Archive with 4 entries (4 files):
- ijms-1911936-supplementary-final.pdf
- Movie S1.mp4
- Movie S2.mp4
- Movie S3.mp4
